# Supplementary material for: Imaging MRI Biomarkers for Diagnosing Brain Radionecrosis: Focus on Incomplete Ring Enhancement Sign
Source: Research Square preprint supplement (doi:10.21203/rs.3.rs-8090402/v1), 2025-11-26
Supplement: Supplementary file 2 [file f992a63f3db2bfa2e6f94650.docx]

SUPPLEMENTAL FILES

***Protocol Optima GE 1.5 T***


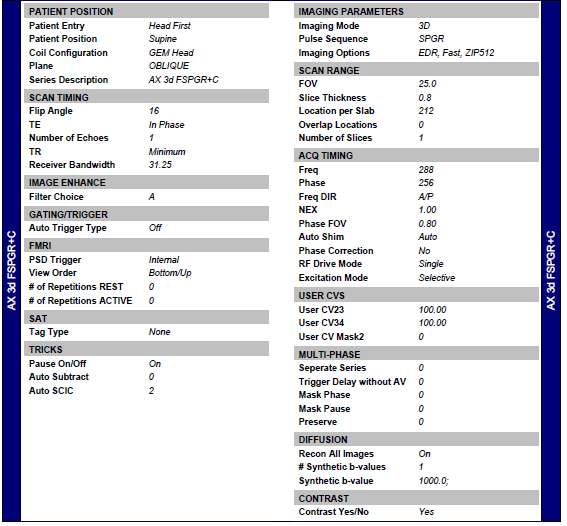


***Protocol Artist GE 1.5 T***
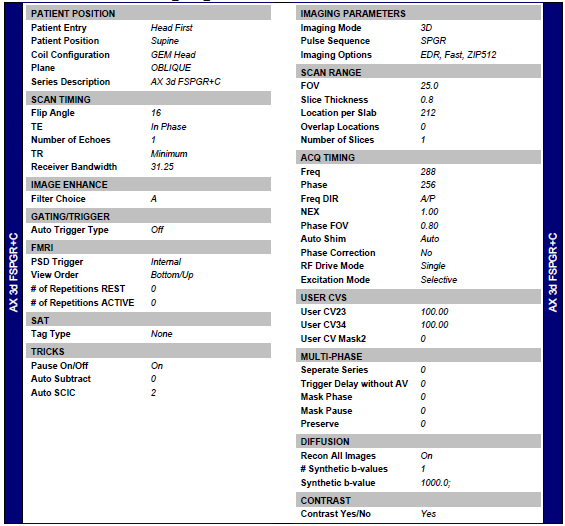


***Philips Achieva 3T***

| Parameter | Value |
| --- | --- |
| Scanner Field Strength | 3T |
| Nucleus | ¹H (Proton) |
| Sequence Type | 3D FFE (Fast Field Echo) |
| Imaging Mode | TFE (Turbo Field Echo), multishot |
| Weighting | T1 |
| Orientation | Transverse |
| Flip Angle (°) | 8 |
| TR / TE (ms) | 6.0 / 2.7 |
| TFE Factor | 218 |
| FOV (AP × RL × FH, mm) | 230 × 183.1 × 170 |
| Acquisition Voxel Size (mm³) | 1 × 1 × 1 |
| Reconstruction Voxel Size (mm³) | 0.53 × 0.53 × 1 |
| Matrix Size (ACQ / Recon) | 232 × 183 / 432 |
| Slices / Slice Gap (mm) | 170 / 0 |
| Parallel Imaging (SENSE) | Yes; RL: 1.4, FH: 1 |
| Bandwidth (Hz) | 299.3 |
| Water-Fat Shift (pixels) | 1.45 |
| Fat / Water Suppression | None |
| Inversion Prepulse | Yes; delay: 1000 ms |
| Partial Echo / Halfscan | No / No |
| Acquisition Time (min:s) | 6:37 |
| NSA (Number of Averages) | 1 |
| SAR (Whole Body / Local) | < 0.2 W/kg / < 7% |
| PNS Level | 72% (Normal) |
| Max B1+rms | 0.60 µT |
| Sound Pressure Level | 22.9 dB |
